## PETCO<sub>2</sub> gradient: a novel prognostic parameter in cardiopulmonary exercise testing

I.D. Poveda Pinedo, I. Marco Clement, O. Gonzalez, I. Ponz, A.M. Iniesta, L. Pena, M.J. Rodriguez, M.D. Hernandez, H. Arranz, A. Araujo, M. Marin, S. Espinosa, R. Dalmau, A. Castro, J.L. Lopez Sendon

University Hospital La Paz, Madrid, Spain

Funding Acknowledgement: Type of funding source: None

**Background:** Previous parameters such as peak VO<sub>2</sub>, VE/VCO<sub>2</sub> slope and OUES have been described to be prognostic in heart failure (HF). The aim of this study was to identify further prognostic factors of cardiopulmonary exercise testing (CPET) in HF patients.

**Methods:** A retrospective analysis of HF patients who underwent CPET from January to November 2019 in a single centre was performed. PETCO<sub>2</sub> gradient was defined by the difference between final PETCO<sub>2</sub> and baseline PETCO<sub>2</sub>. HF events were defined as decompensated HF requiring hospital admission or IV diuretics, or decompensated HF resulting in death.

**Results:** A total of 64 HF patients were assessed by CPET, HF events

occurred in 8 (12.5%) patients. Baseline characteristics are shown in table 1. Patients having HF events had a negative PETCO<sub>2</sub> gradient while patients not having events showed a positive PETCO<sub>2</sub> gradient (−1.5 [IQR −4.8, 2.3] vs 3 [IQR 1, 5] mmHg; p=0.004). A multivariate Cox proportional-hazards regression analysis revealed that PETCO<sub>2</sub> gradient was an independent predictor of HF events (HR 0.74, 95% CI [0.61–0.89]; p=0.002). Kaplan-Meier curves showed a significantly higher incidence of HF events in patients having negative gradients, p=0.002 (figure 1).

**Conclusion:** PETCO<sub>2</sub> gradient was demonstrated to be a prognostic parameter of CPET in HF patients in our study. Patients having negative gradients had worse outcomes by having more HF events.

Baseline characteristics

|                                |                    |
|--------------------------------|--------------------|
| Age, years                     | 59.8±13.7          |
| Male, n (%)                    | 46 (71.9)          |
| HFpEF, n (%)                   | 16 (25)            |
| HFmrEF, n (%)                  | 5 (7.8)            |
| HFrfEF, n (%)                  | 43 (67.2)          |
| Ischaemic heart disease, n (%) | 31 (48.4)          |
| LVEF, %                        | 41.0±16.0          |
| Lung disease, n (%)            | 9 (14.1)           |
| CrCl, mL/min                   | 73.4±16.9          |
| NT-proBNP, pg/ml               | 873 (IQR 350–2064) |

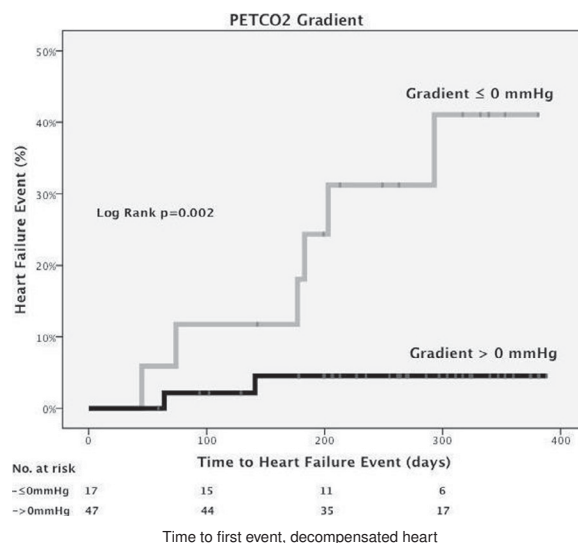

Source: http://academic.oup.com/eurheartj/article-pdf/41/Supplement_2/ehaa946.1077/34520795/ehaa946.1077.pdf
